# Supplementary material for: Outcomes in Patients with Spinal Metastases Managed with Surgical Intervention
Source: MDPI journal article supplement (doi:10.3390/cancers16020438), 2024-01-19
Supplement: s1 [file s1]

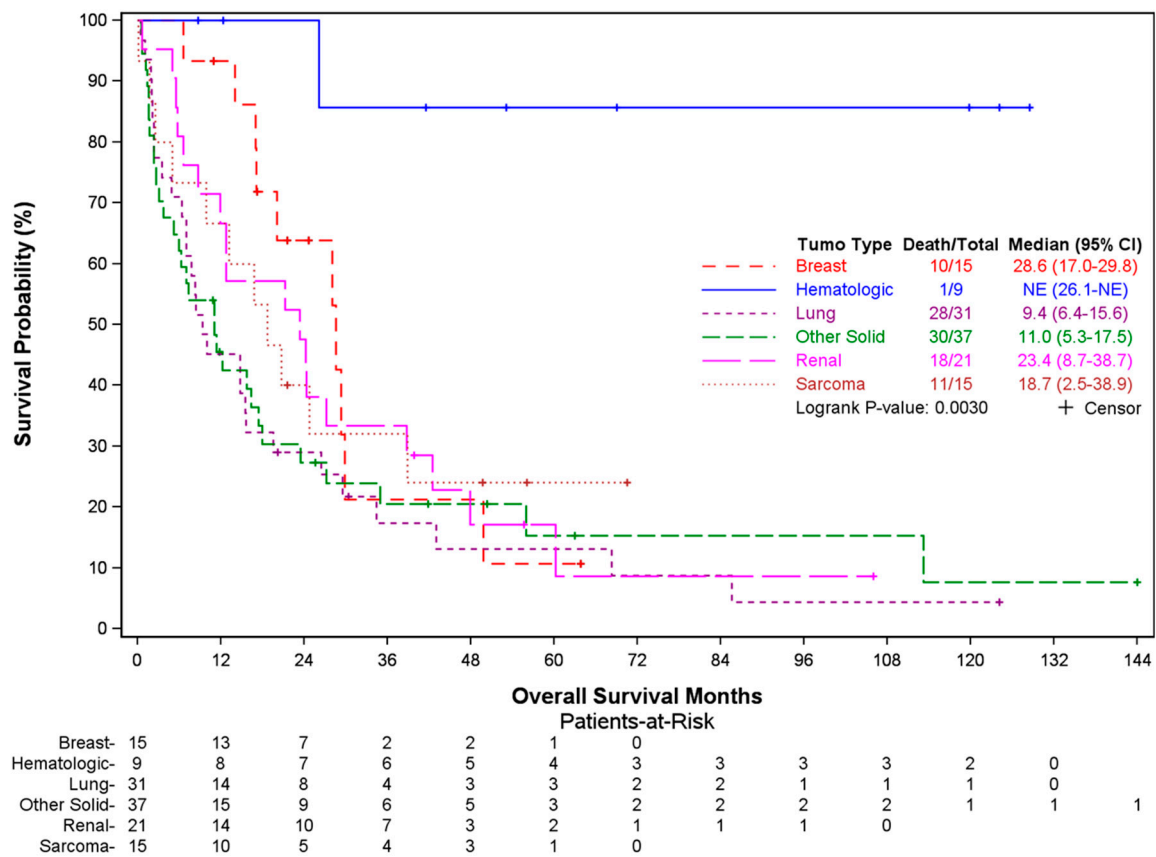

**Figure S1:** Overall Survival in Patients Stratified by Tumor Type.

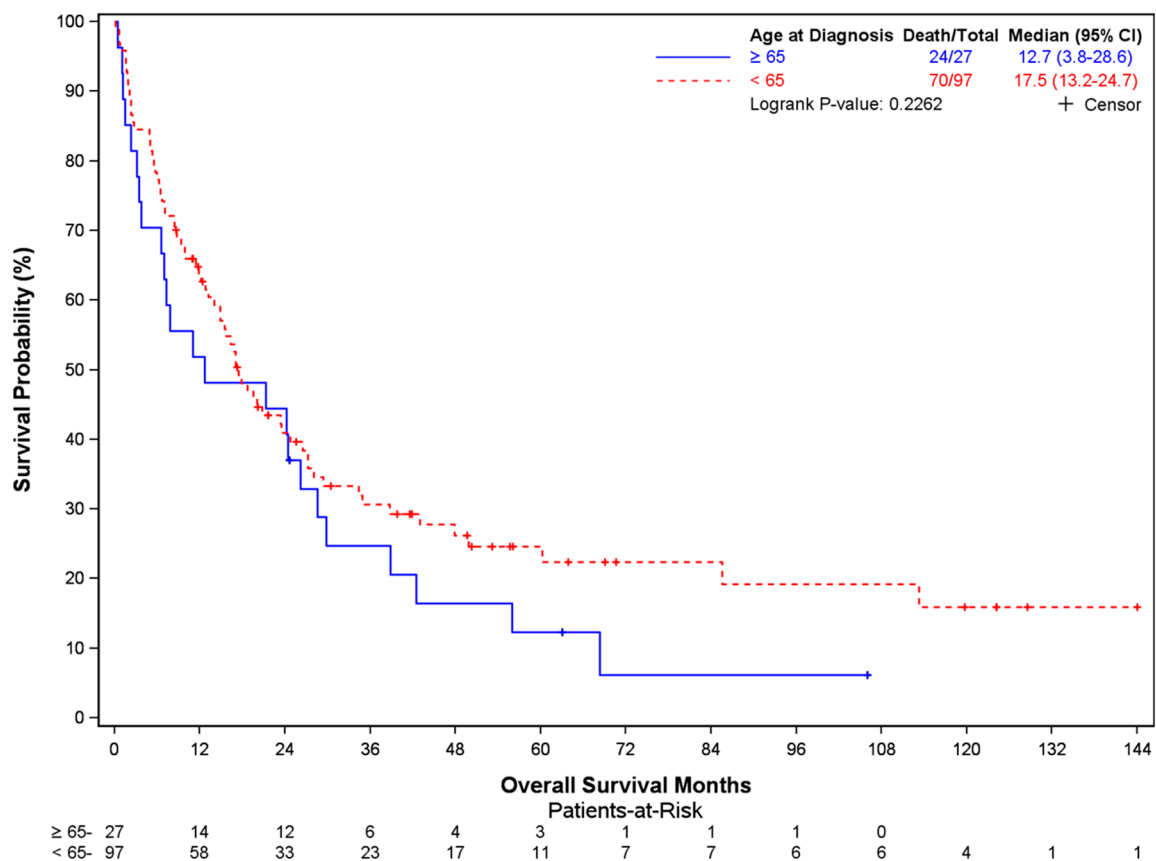

**Figure S2:** Overall Survival in Patients Stratified by Age at Diagnosis.

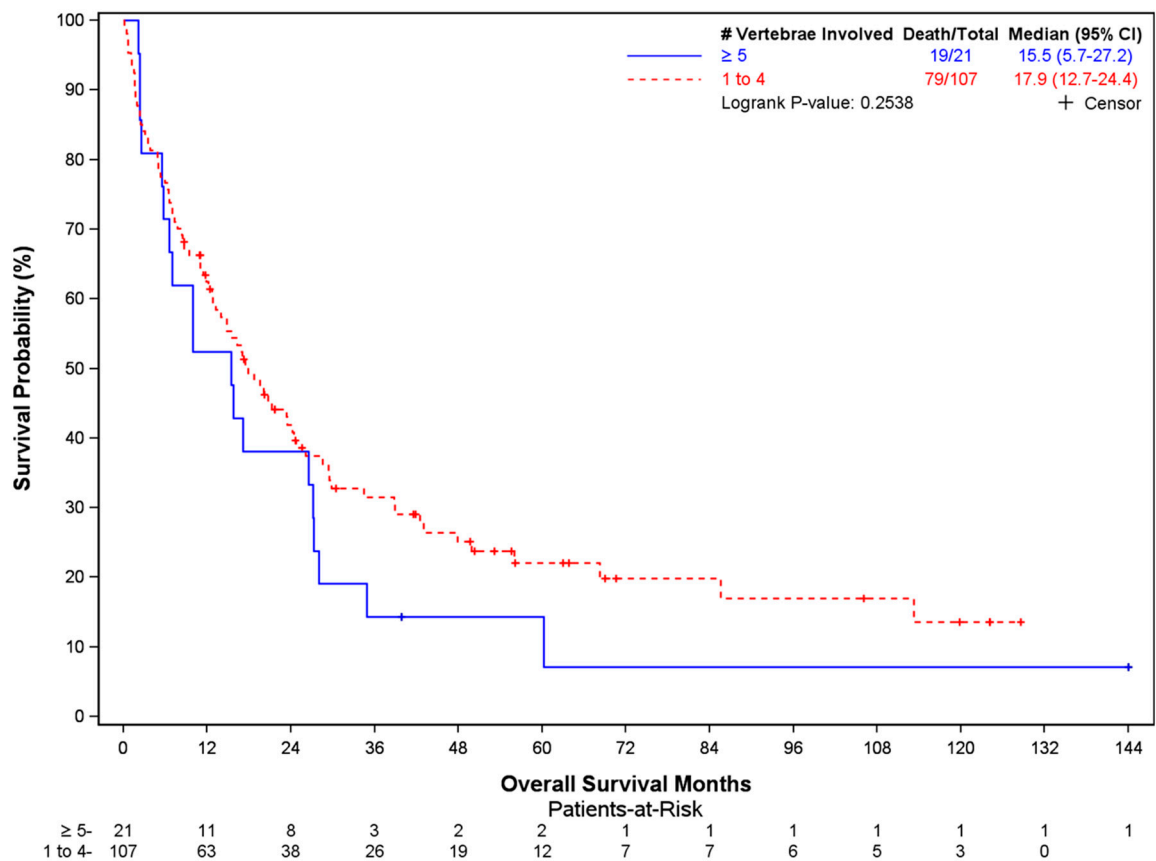

**Figure S3:** Overall Survival in Patients Stratified by Number of Vertebrae Involved.

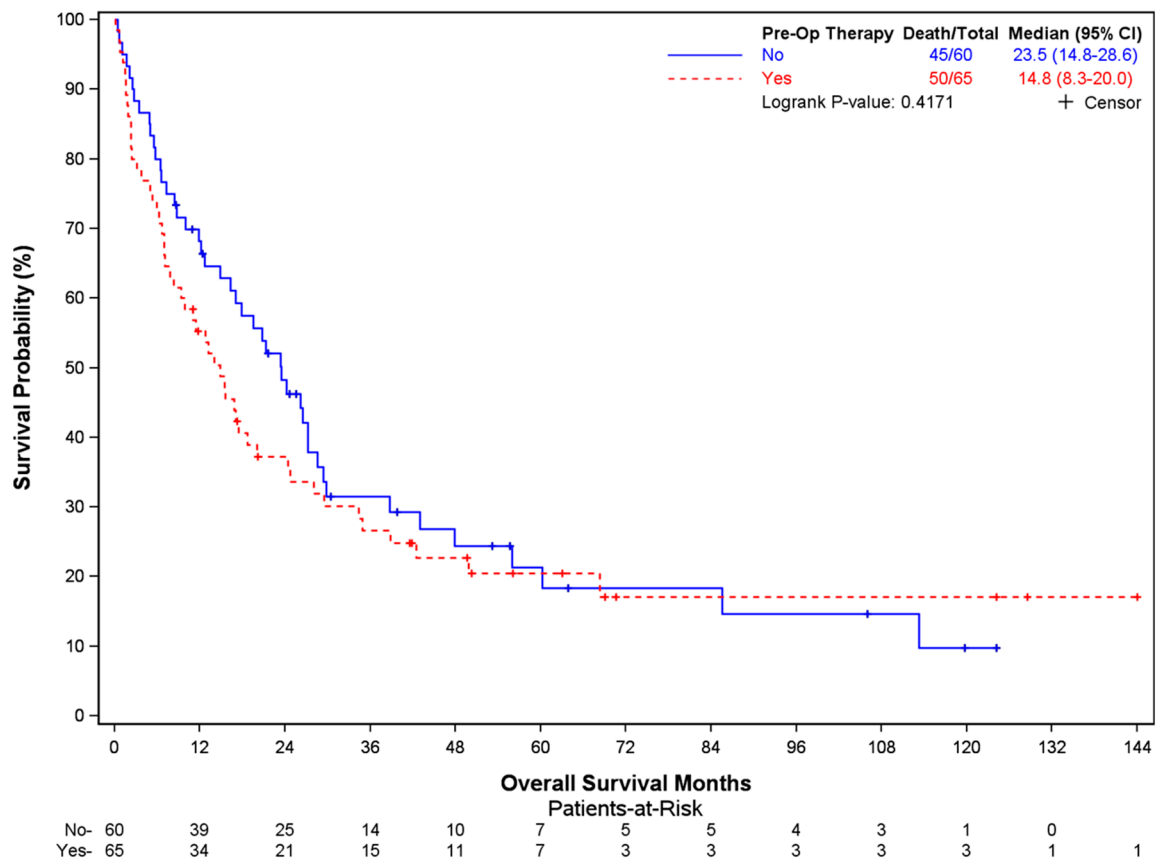

**Figure S4:** Overall Survival in Patients Stratified by Receipt of Pre-Operative Therapy.
