# Supplementary material for: Outcomes in Patients with Spinal Metastases Managed with Surgical Intervention
Source: MDPI journal article supplement (doi:10.3390/cancers16020438), 2024-01-19
Supplement: s1 [file s1]

**Supplementary Table S1: Preoperative Characteristics**

| <b>Characteristic</b>                      | <b>Total Patients</b> |
|--------------------------------------------|-----------------------|
| <b>Number of Vertebrae with Metastases</b> |                       |
| 1                                          | 37/128 (29%)          |
| 2 to 4                                     | 70/128 (55%)          |
| 5 to 10                                    | 15/128 (12%)          |
| > 10                                       | 6/128 (5%)            |
| <b>Location of Metastases</b>              |                       |
| Cervical                                   | 32/128 (25%)          |
| Thoracic                                   | 91/128 (71%)          |
| Lumbar                                     | 32/128 (25%)          |
| Sacral                                     | 5/128 (4%)            |
| <b>Radicular Symptoms</b>                  |                       |
| Yes                                        | 68/128 (53%)          |
| No                                         | 53/128 (41%)          |
| Unknown                                    | 7/128 (5%)            |
| <b>Serum Albumin</b>                       |                       |
| < 3.5                                      | 38/128 (30%)          |
| 3.5 or >                                   | 77/128 (60%)          |
| <b>Received Radiation Therapy</b>          |                       |
| Yes                                        | 59/128 (46%)          |
| No                                         | 66/128 (52%)          |
| Unknown                                    | 3/128 (2%)            |
| <b>Received Immunotherapy</b>              |                       |
| Yes                                        | 6/128 (5%)            |
| No                                         | 118/128 (92%)         |
| Unknown                                    | 4/128 (3%)            |
| <b>Received Cytotoxic Therapy</b>          |                       |
| Yes                                        | 56/128 (44%)          |
| No                                         | 69/128 (54%)          |
| Unknown                                    | 3/128 (2%)            |
| <b>Received Other Therapy<sup>a</sup></b>  |                       |
| Yes                                        | 19/128 (15%)          |
| No                                         | 104/128 (81%)         |
| Unknown                                    | 5/128 (4%)            |
| <b>Surgery on Primary Tumor</b>            |                       |
| Yes                                        | 48/128 (38%)          |
| No                                         | 70/128 (55%)          |
| Unknown                                    | 10/128 (8%)           |
| <b>Received Steroids Pre-operatively</b>   |                       |
| Yes                                        | 30/128 (23%)          |
| No                                         | 80/128 (63%)          |
| Unknown                                    | 18/128 (14%)          |

a: includes miscellaneous therapies such as EGFR inhibitors, other tyrosine kinase inhibitors, oral hormonal therapy, etc

**Supplementary Table S2: Surgical and Peri-Surgical Characteristics**

| Characteristic                                 | Total Patients | Characteristic                              | Total Patients |
|------------------------------------------------|----------------|---------------------------------------------|----------------|
| <b>Surgical Approach</b>                       |                | <b>Postoperative Number of Transfusions</b> |                |
| Anterior                                       | 7/128 (5%)     | 0                                           | 35/128 (27%)   |
| Posterior                                      | 46/128 (36%)   | 1 to 2                                      | 41/128 (32%)   |
| Combined Anterior Posterior                    | 73/128 (57%)   | 3 to 5                                      | 28/128 (22%)   |
| Unknown                                        | 2/128 (2%)     | >6                                          | 8/128 (6%)     |
| <b>Location of Vertebrae Decompressed</b>      |                | Unknown                                     | 16/128 (13%)   |
| Cervical                                       | 19/128 (15%)   | <b>Length of Surgery (hours)</b>            |                |
| Cervical and thoracic                          | 3/128 (2%)     | ≤ 3                                         | 27/128 (21%)   |
| Thoracic                                       | 73/128 (57%)   | 3 to 5                                      | 38/128 (30%)   |
| Thoracic and lumbar                            | 13/128 (10%)   | >5                                          | 11/128 (9%)    |
| Lumbar                                         | 9/128 (7%)     | Unknown                                     | 52/128 (22%)   |
| Lumbar and sacral                              | 3/128 (2%)     | <b>Length of Hospital Stay (Days)</b>       |                |
| Unknown                                        | 8/128 (6%)     | ≤ 3                                         | 17/128 (13%)   |
| <b>Number of Vertebrae Decompressed</b>        |                | 4 to 7                                      | 67/128 (52%)   |
| 1                                              | 32/128 (25%)   | 8 to 14                                     | 30/128 (23%)   |
| 2 to 3                                         | 68/128 (53%)   | >14                                         | 6/128 (5%)     |
| 4 to 6                                         | 24/128 (19%)   | Unknown                                     | 8/128 (6%)     |
| Unknown                                        | 4/128 (3%)     | <b>Additional Spinal Surgery</b>            |                |
| <b>Location of Vertebrae Instrumented</b>      |                | Yes                                         | 23/128 (18%)   |
| Cervical                                       | 15/128 (12%)   | No                                          | 53/128 (41%)   |
| Cervical and thoracic                          | 24/128 (19%)   | Unknown                                     | 52/128 (41%)   |
| Thoracic                                       | 43/128 (34%)   | <b>Additional Spinal Procedure</b>          |                |
| Thoracic and lumbar                            | 29/128 (23%)   | Cement Augmentation                         | 6/128 (5%)     |
| Lumbar                                         | 4/128 (3%)     | Ablation                                    | 7/128 (5%)     |
| Lumbar and sacral                              | 7/128 (5%)     | Unknown                                     | 17/128 (13%)   |
| Sacrum                                         | 1/128 (1%)     | <b>Postoperative Infection</b>              |                |
| Unknown                                        | 5/128 (4%)     | Yes                                         | 17/128 (13%)   |
| <b>Surgical Graft/Cage Use</b>                 |                | No                                          | 103/128 (80%)  |
| None                                           | 22/128 (17%)   | Unknown                                     | 8/128 (6%)     |
| Cage                                           | 28/128 (22%)   | <b>Other Postoperative Complication</b>     |                |
| Cement                                         | 26/128 (20%)   | Yes                                         | 34/128 (27%)   |
| Unknown                                        | 48/128 (38%)   | Neurologic                                  | 8/34 (24%)     |
| <b>Number of Vertebral Levels Instrumented</b> |                | DVT/PE                                      | 8/34 (24%)     |
| 1 to 3                                         | 19/128 (15%)   | Wound                                       | 8/34 (24%)     |
| 4 to 6                                         | 68/128 (53%)   | Cardiac/Respiratory                         | 6/34 (18%)     |
| >6                                             | 39/128 (30%)   | No                                          | 79/128 (62%)   |
| Unknown                                        | 2/128 (2%)     | Unknown                                     | 15/128 (12%)   |
|                                                |                | <b>Death Within 30 days of Surgery</b>      | 4/128 (3%)     |

**Supplementary Table S3: Characteristics of Receipt of Post-Operative Therapy**

| <b>Characteristic</b>                     | <b>Total Patients</b> |
|-------------------------------------------|-----------------------|
| <b>Received Cytotoxic Therapy</b>         |                       |
| Yes                                       | 53/128 (41%)          |
| No                                        | 58/128 (45%)          |
| Unknown                                   | 17/128 (13%)          |
| <b>Received Radiation Therapy</b>         |                       |
| Yes                                       | 78/128 (61%)          |
| No                                        | 40/128 (31%)          |
| Unknown                                   | 10/128 (8%)           |
| <b>Received Immunotherapy</b>             |                       |
| Yes                                       | 15/128 (12%)          |
| No                                        | 96/128 (75%)          |
| Unknown                                   | 17/128 (13%)          |
| <b>Received Other Therapy<sup>a</sup></b> |                       |
| Yes                                       | 42/128 (33%)          |
| No                                        | 71/128 (55%)          |
| Unknown                                   | 15/128 (12%)          |

a: includes therapies such as EGFR inhibitors, oral tyrosine kinase inhibitors, oral hormonal therapy, etc

Supplementary Table S4: Neurologic Outcomes Following Surgery

| Neurologic Symptom/Deficit <sup>a</sup> | Number of Patients |                             |                                      |
|-----------------------------------------|--------------------|-----------------------------|--------------------------------------|
|                                         | Pre-operative      | Post-operative <sup>b</sup> | 1 – 3 mo Post-operative <sup>c</sup> |
| <b>Pain</b>                             | 67/75 (89%)        |                             |                                      |
| Stable/Improved                         |                    | 64/67 (96%)                 | 53/67 (79%)                          |
| Worsened                                |                    | 3/67 (4%)                   | 14/67 (21%)                          |
| <b>Motor</b>                            | 21/75 (28%)        |                             |                                      |
| Stable/improved                         |                    | 19/21 (90%)                 | 15/21 (71%)                          |
| Worsened                                |                    | 2/21 (10%)                  | 6/21 (29%)                           |
| <b>Sensory</b>                          | 15/75 (20%)        |                             |                                      |
| Stable/Improved                         |                    | 12/15 (80%)                 | 12/15 (80%)                          |
| Worsened                                |                    | 3/15 (20%)                  | 3/15 (20%)                           |
| <b>Asymptomatic</b>                     | 4/75 (5.3%)        |                             |                                      |

Detailed neurologic status was available for 75/128 patients pre-operatively. Immediate- and 1-3 mo post-operative status is reported as relative to their pre-operative neurologic status.

<sup>b</sup>Unknown in 1/75 patients.

<sup>c</sup>Unknown in 5 patients, 2 patients deceased. Known in 68/75 patients.

**Supplementary Table S5: Univariate and Multivariate Logistic Regressions Assessing Risk Factors Associated with Post-Op Therapy**

|                                | Univariate          |                 | Multivariate        |                 |
|--------------------------------|---------------------|-----------------|---------------------|-----------------|
| Risk Factors                   | Odds Ratio (95% CI) | <i>p</i> -value | Odds Ratio (95% CI) | <i>p</i> -value |
| <b>Age at Diagnosis</b>        |                     | 0.7074          |                     |                 |
| < 65                           | -ref-               |                 |                     |                 |
| ≥ 65                           | 1.2 (0.46-3.11)     |                 |                     |                 |
| <b>Age at Surgery</b>          |                     | 0.1223          |                     |                 |
| < 65                           | -ref-               |                 |                     |                 |
| ≥ 65                           | 0.51 (0.21-1.2)     |                 |                     |                 |
| <b>Tumor Type <sup>a</sup></b> |                     | 0.0582          |                     | 0.0491          |
| Hematologic                    | -ref-               |                 | -ref-               |                 |
| Breast                         | 1.86 (0.1-34.43)    |                 | 1.77 (0.1-32.84)    |                 |
| Lung                           | 0.14 (0.02-1.35)    |                 | 0.12 (0.01-1.12)    |                 |
| Other Solid                    | 0.17 (0.02-1.53)    |                 | 0.15 (0.02-1.35)    |                 |
| Renal                          | 0.5 (0.05-5.36)     |                 | 0.4 (0.04-4.34)     |                 |
| Sarcoma                        | 0.14 (0.01-1.49)    |                 | 0.12 (0.01-1.31)    |                 |
| <b>BMI</b>                     |                     | 0.4729          |                     |                 |
| ≤ 30                           | -ref-               |                 |                     |                 |
| >30                            | 1.36 (0.58-3.18)    |                 |                     |                 |
| <b># Vertebrae Involved</b>    |                     | 0.1841          |                     | 0.1041          |
| 1 to 4                         | -ref-               |                 | -ref-               |                 |
| ≥ 5                            | 2.23 (0.68-7.3)     |                 | 2.78 (0.81-9.55)    |                 |
| <b>Extraspinal Mets</b>        |                     | 0.4881          |                     |                 |
| No                             | -ref-               |                 |                     |                 |
| Yes                            | 0.76 (0.35-1.65)    |                 |                     |                 |
| <b>ECOG</b>                    |                     | 0.0593          |                     |                 |
| 0/1                            | -ref-               |                 |                     |                 |
| 2/3                            | 0.45 (0.19-1.03)    |                 |                     |                 |
| <b>Pre-Op Therapy</b>          |                     | 0.5821          |                     |                 |
| No                             | -ref-               |                 |                     |                 |
| Yes                            | 0.8 (0.37-1.74)     |                 |                     |                 |

<sup>a</sup>The 13 tumor types were consolidated into 6 groups: Breast, Lung, Renal, Sarcoma, Hematologic (Multiple Myeloma and Lymphoma), and Other solid (Bladder, Gastrointestinal, Gynecologic, Prostate, Thyroid, Melanoma, and Other (head and neck [2] squamous cell carcinoma of unknown primary [2], neuroblastoma, neuroendocrine tumor of unknown primary, thymoma)
